# Supplementary material for: Plant age and soil texture rather than the presence of root hairs cause differences in maize resource allocation and root gene expression in the field
Source: Research Square preprint supplement (doi:10.21203/rs.3.rs-1605642/v1), 2022-05-17
Supplement: Supplementary file 1 [file 080c86d86086ac02214bf451.xlsx]

## Sheet: p-values
		depth_19	depth_19	depth_59	depth_59	depth_19_L	depth_19_L	depth_59_L	depth_59_L	depth_19_S	depth_19_S	depth_59_S	depth_59_S	geno_14	geno_14	geno_19	geno_19	geno_59	geno_59	geno_14_L	geno_14_L	geno_19_L	geno_19_L	geno_59_L	geno_59_L	geno_14_S	geno_14_S	geno_19_S	geno_19_S	geno_59_S	geno_59_S	19v14	19v14	59v19	59v19	59v14	59v14
name	category	LFC	P	LFC	P	LFC	P	LFC	P	LFC	P	LFC	P	LFC	P	LFC	P	LFC	P	LFC	P	LFC	P	LFC	P	LFC	P	LFC	P	LFC	P	LFC	P	LFC	P	LFC	P
ABA stress ripening3	defense	-0.290417	0.399209	0.116146	0.719957	-0.0502083	0.90588	-0.1	0.805486	-0.530625	0.115056	0.332292	0.535996	-0.820208	0.0785043	-0.101042	0.770472	-0.190938	0.554867	-0.282917	0.690953	-0.263958	0.531328	-0.256667	0.524712	-1.3575	0.00636977	0.061875	0.860542	-0.125208	0.816714	-2.10979	0.168995	-0.442448	0.0176433	-2.55224	0.306532
ACC synthase6	defense	0.0686458	0.796925	0.0808333	0.78175	-0.0720833	0.850213	-0.411875	0.256832	0.209375	0.5643	0.573542	0.0835106	-0.285833	0.459183	-0.528229	0.040354	0.0325	0.911358	0.177083	0.794823	-0.242083	0.523074	-0.0797917	0.830002	-0.74875	0.109237	-0.814375	0.0127846	0.144792	0.678159	1.29286	0.125488	-1.00182	0.171048	0.291042	0.34755
Acidic endochitinase	defense	-0.530104	0.366286	0.0475833	0.926301	-0.762708	0.0903234	-0.0745833	0.923172	-0.2975	0.731788	0.222292	0.736238	0.226667	0.834406	-0.0551042	0.925687	1.07812	0.0289489	-1.31292	0.378233	-0.455208	0.328927	0.636131	0.404331	1.76625	0.11255	0.345	0.690797	1.55354	0.00768797	4.26036	0.247017	-2.49068	0.00977326	1.76968	0.21832
Chitinase chem5	defense	0.0711458	0.78739	0.348021	0.176128	0.0847917	0.824497	0.4375	0.320204	0.0575	0.862612	0.258542	0.373514	0.239792	0.530762	0.204896	0.435235	0.747812	0.00194504	-0.0216667	0.957245	0.373542	0.320183	0.932083	0.0223592	0.50125	0.365513	0.03625	0.913155	0.563542	0.0389234	0.66099	0.513292	0.542396	0.013849	1.20339	0.00219505
Defensin-like protein 6	defense	0.227083	0.724158	-1.5576	0.0183946	-0.166458	0.853965	-0.308125	0.673535	0.620625	0.447599	-2.80708	0.00240909	0.950417	0.379077	-0.0379167	0.953059	0.983438	0.148107	2.48333	0.132063	-0.0227083	0.97998	0.150208	0.837679	-0.5825	0.65753	-0.053125	0.948716	1.81667	0.0768543	0.119583	4.91931e-05	-1.60026	0.119186	-1.48068	0.596463
Disease resistance RPP13-like 4	defense	0.269583	0.49913	-1.30385	0.0144734	0.558542	0.361695	-1.57187	0.000956606	-0.019375	0.947421	-1.03583	0.124977	0.858542	0.0928758	0.197708	0.620759	1.01594	0.0619838	1.44708	0.0433694	0.453542	0.46129	0.155208	0.786935	0.27	0.569446	-0.058125	0.843073	1.87667	0.00150819	-0.0516667	0.00200396	-0.49901	0.17298	-0.550677	0.0786146
Ethylene receptor homolog2	defense	0.176146	0.0521251	-0.00541667	0.945613	0.215417	0.121273	-0.056875	0.657177	0.136875	0.282591	0.0460417	0.521908	-0.0608333	0.667693	-0.0451042	0.629286	0.090625	0.248407	-0.215417	0.375865	-0.0445833	0.758532	0.0539583	0.673828	0.09375	0.521836	-0.045625	0.725276	0.127292	0.0610708	-0.11526	0.238559	-0.144635	0.0116072	-0.259896	0.135132
Ethylene-responsive TF2	defense	0.274583	0.127854	0.528333	0.007115	0.146042	0.60827	0.563125	0.0111576	0.403125	0.0724008	0.493542	0.109024	-0.224583	0.278042	-0.186042	0.307438	0.26	0.206241	0.0495833	0.834121	-0.273958	0.33019	-0.0660417	0.790525	-0.49875	0.086602	-0.098125	0.67915	0.586042	0.0518146	-0.0819792	0.863366	0.234896	0.171865	0.152917	0.601651
Gibberellin 20-oxidase3	defense	-0.961354	0.0114684	-0.491042	0.078124	-1.45083	0.0225655	-0.68875	0.0388153	-0.471875	0.284955	-0.293333	0.494041	-0.303333	0.669727	0.0792708	0.843278	0.306875	0.278692	-1.91042	0.0617593	-0.110833	0.873884	0.399583	0.255851	1.30375	0.0273428	0.269375	0.547398	0.214167	0.618988	-0.0436979	0.999877	-0.35151	0.651184	-0.395208	0.012228
Jasmonate-induced protein	defense	-0.477604	0.114257	-1.09323	0.00935	-0.562083	0.196661	-1.44938	0.000751143	-0.393125	0.222414	-0.737083	0.0331996	-0.198333	0.51145	0.151146	0.623849	-0.0096875	0.982631	-0.521667	0.160574	0.294167	0.508865	-0.343542	0.508121	0.125	0.744702	0.008125	0.980426	0.324167	0.381467	0.686302	0.759798	-1.19229	0.315435	-0.50599	0.98108
Lipoxygenase	defense	0.0861458	0.734527	0.103021	0.536853	0.341667	0.254557	0.01375	0.933414	-0.169375	0.608967	0.192292	0.508	-0.230833	0.429227	0.341146	0.172939	0.282187	0.0837775	-0.537917	0.188006	0.489167	0.0936239	0.278333	0.0729414	0.07625	0.865624	0.193125	0.559126	0.286042	0.319857	0.491615	1.77802e-06	-0.316667	2.22791e-09	0.174948	0.439348
NPR1	defense	0.0498958	0.757651	0.713646	0.00220888	0.249792	0.227781	0.773125	0.00186614	-0.15	0.512884	0.654167	0.00859658	-0.123333	0.628614	-0.408854	0.00731186	0.0978125	0.697485	0.0383333	0.923505	-0.242708	0.241977	-0.258542	0.372723	-0.285	0.428705	-0.575	0.00396523	0.454167	0.0889679	0.576615	0.944901	0.0720833	0.000349292	0.648698	0.0333582
Pathogenesis-related protein 10	defense	0.510208	0.421942	0.0730208	0.84698	0.794792	0.374708	-0.08375	0.837421	0.225625	0.802472	0.229792	0.730864	-1.33708	0.0934155	-0.0366667	0.954227	-0.954063	0.00746817	-2.37042	0.0694688	-0.192708	0.83188	0.0183333	0.964199	-0.30375	0.75659	0.119375	0.894795	-1.92646	0.0003362	0.359896	0.479102	0.309427	0.297562	0.669323	0
Pathogenesis-related protein3	defense	0.0492708	0.894018	0.296458	0.410298	0.514792	0.435464	0.46375	0.157849	-0.41625	0.233861	0.129167	0.767426	-0.268333	0.502564	0.378021	0.302442	0.54625	0.123833	-1.18167	0.0620851	0.889792	0.167464	0.527083	0.104382	0.645	0.136416	-0.13375	0.708688	0.565417	0.181668	-0.00369792	0.360202	0.577552	0.0216601	0.573854	0.121646
Protease inhibitor; Proteinase inhibitor	defense	0.150208	0.808004	0.426771	0.325643	0.319167	0.656005	0.2725	0.605643	-0.01875	0.981451	0.581042	0.289298	-0.164583	0.7383	0.729583	0.23247	0.561562	0.193144	-1.28417	0.023959	0.290417	0.685438	0.885833	0.0770372	0.955	0.165131	1.16875	0.130732	0.237292	0.670623	0.494583	3.07953e-10	0.520365	0.143604	1.01495	0.000288986
Al-activated malate transporter 10	exudation	0.0780208	0.846932	-1.84542	0.0030944	-0.0202083	0.972488	-1.82	0.0161645	0.17625	0.576123	-1.87083	0.0296593	0.451042	0.5827	-0.245104	0.543098	1.03375	0.115543	1.86958	0.110926	-0.0752083	0.897842	-0.205417	0.806471	-0.9675	0.179728	-0.415	0.175858	2.27292	0.00540224	0.215365	0.000810069	-1.10807	0.807952	-0.892708	0.0361848
Al-activated malate transporter 8	exudation	-0.416042	0.0256309	0.0794097	0.80355	-0.348958	0.242421	-0.00946429	0.971092	-0.483125	0.0376594	0.0822917	0.823303	-0.240833	0.606143	-0.0260417	0.893397	0.316861	0.316924	-1.13792	0.0627877	-0.0414583	0.892243	0.350357	0.163242	0.65625	0.31468	-0.010625	0.966281	0.206042	0.574209	-0.0741667	0.976814	-0.771862	0.00322246	-0.846028	6.92387e-08
benzoxazinless1	exudation	-1.1101	0.145609	-0.297917	0.561945	-0.537083	0.665153	0.02625	0.957197	-1.68312	0.0856163	-0.622083	0.36808	-0.103333	0.817994	-1.94448	0.00792686	-0.958125	0.0550717	0.563333	0.487084	-2.23708	0.0547068	-0.359167	0.458169	-0.77	0.0530595	-1.65187	0.0922948	-1.55708	0.0132531	-1.67182	2.25573e-07	-0.260573	0.0024384	-1.9324	0.00256518
MATE1	exudation	-0.380104	0.0563558	-0.0469792	0.728133	-0.444583	0.092888	-0.000625	0.997454	-0.315625	0.286196	-0.0933333	0.634178	0.00166667	0.995181	-0.177604	0.384122	-0.0903125	0.502789	-0.295417	0.553624	-0.217083	0.430559	-0.0635417	0.745173	0.29875	0.352047	-0.138125	0.646371	-0.117083	0.549571	-0.950573	0.890983	0.558333	0.0138582	-0.39224	0.000136889
sucrose transporter1	exudation	-0.0235417	0.900073	0.248333	0.550974	0.0804167	0.802768	0.56875	0.175025	-0.1275	0.533198	-0.0720833	0.846274	-0.322708	0.29279	-0.0260417	0.889523	0.10875	0.794482	-0.952917	0.0307754	-0.0395833	0.902239	0.233333	0.588634	0.3075	0.470225	-0.0125	0.951633	-0.0158333	0.966055	-1.53573	0.281785	0.731771	0.054396	-0.803958	0.718511
SWEET13c	exudation	0.237708	0.447027	0.0983333	0.825243	0.336667	0.466188	0.900625	0.0087246	0.13875	0.750646	-0.703958	0.195603	0.171667	0.779495	0.510833	0.0960161	0.27125	0.541353	-0.276667	0.739284	0.577917	0.201833	-0.191042	0.621006	0.62	0.507421	0.44375	0.300797	0.733542	0.176263	-0.454167	0.0360524	0.626771	0.999989	0.172604	0.0132316
SWEET4a	exudation	-0.0857292	0.697967	0.261771	0.328862	-0.0752083	0.79457	0.135625	0.47473	-0.09625	0.752431	0.387917	0.136536	-0.0714583	0.759564	-0.241979	0.269016	-0.302812	0.257365	-0.410417	0.160237	-0.236458	0.407626	-0.0410417	0.830196	0.2675	0.442906	-0.2475	0.412346	-0.564583	0.0222765	-0.217448	0	0.463333	1.67383e-07	0.245885	0.000330474
transporter of mugineic acid1	exudation	0.418958	0.612423	-4.60323	0.000135376	1.24292	0.219027	-3.95125	0.0184779	-0.405	0.547296	-5.25521	0.00488989	2.13604	0.249874	-0.449167	0.586907	1.56469	0.243826	1.96333	0.467871	-1.13958	0.261972	-0.850417	0.644978	2.30875	0.0193476	0.24125	0.721144	3.97979	0.0465002	0.658646	0.999869	-0.393698	0.00107369	0.264948	2.01629e-06
Auxin response factor 16	growth	0.0427083	0.798468	0.684896	0.00222783	0.0316667	0.910038	0.65625	0.0102877	0.05375	0.796815	0.713542	0.00598365	-0.130833	0.421329	-0.406667	0.0102543	0.146563	0.543454	-0.0279167	0.909714	-0.410833	0.126055	-0.132917	0.642676	-0.23375	0.364264	-0.4025	0.0372457	0.426042	0.134762	0.115521	0.562964	0.19474	0.561381	0.31026	0.773649
Auxin response factor 8	growth	-0.311979	0.0968964	0.464896	0.0864759	-0.446458	0.179803	0.35875	0.0468161	-0.1775	0.348415	0.571042	0.00884951	-0.312708	0.28273	-0.456979	0.0123018	0.0653125	0.814164	-0.800417	0.0399287	-0.651458	0.0411298	0.0533333	0.782956	0.175	0.70225	-0.2625	0.156926	0.0772917	0.753379	-0.496198	0.457581	-0.000729167	0.109833	-0.496927	0.000922956
Expansin-A11	growth	0.0658333	0.870994	-0.827292	0.0322792	0.0522917	0.900722	-0.43375	0.165496	0.079375	0.844653	-1.22083	0.0696583	-0.00208333	0.996254	-0.392292	0.329406	0.88875	0.0206275	-0.644167	0.400413	-0.130208	0.755724	0.202083	0.52984	0.64	0.146362	-0.654375	0.0887544	1.57542	0.0140397	-0.153229	0.885813	0.163646	0.812905	0.0104167	0.999439
Kinesin KP1	growth	-0.0772917	0.809607	-1.09292	0.000289676	-0.180208	0.673845	-0.98875	0.00834449	0.025625	0.920704	-1.19708	0.0113481	0.211042	0.619166	-0.104792	0.743826	0.60875	0.0618907	0.643333	0.369528	0.0247917	0.953976	0.273333	0.51613	-0.22125	0.659846	-0.234375	0.355042	0.944167	0.0571753	-0.495729	0.70702	-0.621354	0.681013	-1.11708	0.0505208
HAK20	K_transport	-0.310417	0.526343	-0.898542	0.0984271	-0.580208	0.24386	-1.45	0.0256722	-0.040625	0.95743	-0.347083	0.564086	0.956042	0.234018	-0.198542	0.685896	0.141875	0.798625	-0.189167	0.791846	-0.177708	0.72717	-0.404167	0.567341	2.10125	0.0895081	-0.219375	0.772829	0.687917	0.244036	2.07083	0.0210451	0.735833	0.0855434	2.80667	0.941034
KCH2	K_transport	-0.766667	0.024574	0.554583	0.0653466	-0.538333	0.177121	0.383125	0.15292	-0.995	0.085221	0.726042	0.0611478	-0.172708	0.701418	-0.297292	0.400559	0.05375	0.862161	-1.21417	0.0835844	0.249167	0.543013	0.250208	0.36123	0.86875	0.102813	-0.84375	0.150992	-0.142708	0.729304	-1.02917	4.06026e-08	0.475833	5.39541e-05	-0.553333	0.145994
ZORK	K_transport	0.293646	0.165979	0.741146	0.000329511	0.117917	0.703048	0.46625	0.0133153	0.469375	0.128372	1.01604	2.71525e-05	-0.267708	0.398115	-0.573229	0.00443244	-0.0378125	0.869027	-0.455417	0.370669	-0.563333	0.0517021	0.0145833	0.944683	-0.08	0.865701	-0.583125	0.0525512	-0.0902083	0.780521	0.0969271	1.34517e-06	0.314896	4.16793e-06	0.411823	0.00254113
AMT2	N_transport	0.119271	0.740338	-0.951667	0.027234	0.607917	0.267375	-1.115	0.000724084	-0.369375	0.295145	-0.788333	0.0266523	0.212917	0.648745	-0.208854	0.560939	0.380625	0.393628	-0.764167	0.0838343	-0.138333	0.804912	0.343333	0.386311	1.19	0.0276601	-0.279375	0.432542	0.417917	0.271464	-0.454635	0.001159	0.73599	0.0974665	0.281354	0.0281519
AMT7	N_transport	-0.831667	0.0287129	-0.386042	0.295247	-1.21271	0.0135264	-1.14187	0.0185615	-0.450625	0.387055	0.369792	0.383959	0.0904167	0.893301	-0.170417	0.666262	0.25625	0.48947	-0.744167	0.493565	-0.347708	0.522371	0.113958	0.831435	0.925	0.108303	0.006875	0.989616	0.398542	0.346959	1.19646	0.86362	-0.500729	0.106296	0.695729	0.432808
NRT2	N_transport	0.956854	0.0415697	-1.13354	0.0881294	1.09595	0.0920588	-2.03187	0.00577971	0.79625	0.25897	-0.235208	0.590237	1.17792	0.16236	-0.803042	0.0907793	-0.13875	0.838541	-0.691667	0.414587	-0.547351	0.420259	-0.342292	0.683645	3.0475	0.00815918	-1.07625	0.119206	0.0647917	0.88266	-0.948931	0.362622	1.15466	0.0600338	0.205729	0.0357198
NRT3	N_transport	-0.0701042	0.905881	-0.790417	0.139011	-0.362708	0.692163	-0.5525	0.31341	0.2225	0.670383	-1.02833	0.171283	0.582917	0.461084	-0.145104	0.806593	1.0625	0.0433385	1.39458	0.257996	-0.177708	0.846527	0.179583	0.747311	-0.22875	0.839271	-0.1125	0.83003	1.94542	0.00372784	-0.00713542	0.000656382	-0.34526	0.492393	-0.352396	0.00101622
NRT5	N_transport	-0.761042	0.0609059	0.118021	0.814627	-1.07521	0.0459404	-0.51625	0.323461	-0.446875	0.451784	0.752292	0.110793	0.184167	0.781791	-0.169792	0.684351	-0.154688	0.758534	-0.795417	0.458044	-0.403958	0.481419	-0.0166667	0.975025	1.16375	0.0573499	0.064375	0.914563	-0.292708	0.551082	0.770521	0.990576	0.578802	0.273473	1.34932	0.106448
PHT12	P_transport	-1.06885	0.0459601	-0.406042	0.350738	-1.67708	0.00750369	-1.16375	0.000738504	-0.460625	0.167964	0.351667	0.397125	-0.803958	0.126188	-0.209479	0.704889	-0.079375	0.856268	-0.602917	0.396831	-0.559583	0.426675	0.359583	0.385123	-1.005	0.254587	0.140625	0.683478	-0.518333	0.204555	-0.650885	0.0643333	-0.99276	1.82004e-05	-1.64365	0.145511
PHT2	P_transport	0.025997	0.885467	-0.374792	0.154456	0.112917	0.539279	-0.845625	0.00097899	0.0302083	0.873172	0.0960417	0.655839	-0.305833	0.199067	0.0267778	0.88179	0.155625	0.559953	-0.159167	0.687356	0.125417	0.49461	-0.0172917	0.955476	-0.4525	0.182018	-0.0859524	0.644954	0.328542	0.111605	-0.222139	0.00466896	-0.310257	0.808292	-0.532396	0.00725276
PHT7	P_transport	-0.0244792	0.953804	-0.150104	0.681992	-0.123958	0.677904	-0.806875	0.0427867	0.075	0.811586	0.506667	0.0107233	-0.567083	0.167372	-0.238854	0.570863	-0.272188	0.456	-0.0216667	0.963059	-0.338958	0.245825	-0.128542	0.764116	-1.1125	0.131561	-0.13875	0.658386	-0.415833	0.0449088	-0.327448	0.383966	0.268021	0.0417634	-0.0594271	0.949757
PIP1;5	water	0.132708	0.553139	-1.06385	3.69938e-05	0.104792	0.769862	-1.14062	0.00299599	0.160625	0.468007	-0.987083	0.00565982	0.312292	0.418238	0.173333	0.437594	0.174687	0.553789	0.859583	0.0820888	0.517292	0.132867	-0.229792	0.606776	-0.235	0.386707	-0.170625	0.440177	0.579167	0.140127	0.617396	0.870483	-0.0552604	0.000117789	0.562135	0.960734
PIP2;3	water	0.0927083	0.745826	-1.95229	4.60249e-05	-0.0402083	0.917135	-2.15313	0.00548163	0.225625	0.304454	-1.75146	0.0005768	0.306667	0.626588	-0.0322917	0.910176	0.41625	0.445277	0.799583	0.378683	0.147292	0.702394	0.0452083	0.959429	-0.18625	0.488069	-0.211875	0.336019	0.787292	0.193074	0.494896	0.149767	-0.0226042	0.0174594	0.472292	0.86186
PIP2;6	water	-0.0707292	0.806406	-1.22354	6.13482e-05	-0.336458	0.493247	-1.36437	0.00896058	0.195	0.469561	-1.08271	0.000180316	0.350417	0.581116	0.327396	0.251597	-0.03	0.931252	1.67333	0.0352207	0.806042	0.0859367	-0.254792	0.664532	-0.9725	0.113239	-0.15125	0.57633	0.194792	0.593482	1.1138	0.0190229	0.148802	0.950472	1.2626	0.00592305
Sum DEG p<0.05			6		15		4		22		1		14		0		6		5		5		1		1		5		3		11		15		18		19
statistics: Tukey test	0.00166185	p<0.05
LFC (log fold change): ΔΔCT	0.681992	p>0.05
FDR corrected
name	category
ABA stress ripening3	defense	-0.290417	0.93275	0.116146	0.880294	-0.0502083	0.943	-0.1	0.948857	-0.530625	0.82	0.332292	0.691875	-0.820208	0.886129	-0.101042	0.95	-0.190938	0.791724	-0.282917	0.857273	-0.263958	0.82	-0.256667	0.956667	-1.3575	0.205	0.061875	0.99	-0.125208	0.862051	-2.10979	0.366842	-0.442448	0.0482353	-2.55224	0.453929
ACC synthase6	defense	0.0686458	0.93275	0.0808333	0.89359	-0.0720833	0.943	-0.411875	0.394815	0.209375	0.914615	0.573542	0.192941	-0.285833	0.886129	-0.528229	0.273333	0.0325	0.95325	0.177083	0.899722	-0.242083	0.82	-0.0797917	0.956667	-0.74875	0.322143	-0.814375	0.205	0.144792	0.796571	1.29286	0.313529	-1.00182	0.240345	0.291042	0.494828
Acidic endochitinase	defense	-0.530104	0.93275	0.0475833	0.95	-0.762708	0.527143	-0.0745833	0.99425	-0.2975	0.964054	0.222292	0.798421	0.226667	0.895526	-0.0551042	0.95	1.07812	0.3075	-1.31292	0.646538	-0.455208	0.82	0.636131	0.956667	1.76625	0.322143	0.345	0.99	1.55354	0.0585714	4.26036	0.488095	-2.49068	0.0292857	1.76968	0.334074
Chitinase chem5	defense	0.0711458	0.93275	0.348021	0.32087	0.0847917	0.943	0.4375	0.437333	0.0575	0.964054	0.258542	0.577037	0.239792	0.886129	0.204896	0.949474	0.747812	0	-0.0216667	0.96	0.373542	0.82	0.932083	0.82	0.50125	0.6068	0.03625	0.99	0.563542	0.164	0.66099	0.746786	0.542396	0.0292857	1.20339	0
Defensin-like protein 6	defense	0.227083	0.93275	-1.5576	0.0630769	-0.166458	0.943	-0.308125	0.807941	0.620625	0.914615	-2.80708	0	0.950417	0.886129	-0.0379167	0.95	0.983438	0.5125	2.48333	0.380714	-0.0227083	0.98	0.150208	0.956667	-0.5825	0.773143	-0.053125	0.99	1.81667	0.218667	0.119583	0	-1.60026	0.1968	-1.48068	0.745455
Disease resistance RPP13-like 4	defense	0.269583	0.93275	-1.30385	0.0341667	0.558542	0.798421	-1.57187	0	-0.019375	0.98	-1.03583	0.246	0.858542	0.886129	0.197708	0.95	1.01594	0.3075	1.44708	0.273333	0.453542	0.82	0.155208	0.956667	0.27	0.708182	-0.058125	0.99	1.87667	0	-0.0516667	0	-0.49901	0.240345	-0.550677	0.15619
Ethylene receptor homolog2	defense	0.176146	0.273333	-0.00541667	0.95	0.215417	0.615	-0.056875	0.807941	0.136875	0.82	0.0460417	0.687742	-0.0608333	0.886129	-0.0451042	0.95	0.090625	0.627059	-0.215417	0.646538	-0.0445833	0.946154	0.0539583	0.956667	0.09375	0.66625	-0.045625	0.99	0.127292	0.175714	-0.11526	0.488095	-0.144635	0.0292857	-0.259896	0.236538
Ethylene-responsive TF2	defense	0.274583	0.444167	0.528333	0.0341667	0.146042	0.943	0.563125	0.0273333	0.403125	0.82	0.493542	0.237368	-0.224583	0.886129	-0.186042	0.902	0.26	0.615	0.0495833	0.91973	-0.273958	0.82	-0.0660417	0.956667	-0.49875	0.322143	-0.098125	0.99	0.586042	0.170833	-0.0819792	1	0.234896	0.240345	0.152917	0.745455
Gibberellin 20-oxidase3	defense	-0.961354	0.273333	-0.491042	0.192941	-1.45083	0.273333	-0.68875	0.0780952	-0.471875	0.82	-0.293333	0.687742	-0.303333	0.886129	0.0792708	0.95	0.306875	0.637778	-1.91042	0.273333	-0.110833	0.946154	0.399583	0.956667	1.30375	0.246	0.269375	0.99	0.214167	0.770303	-0.0436979	1	-0.35151	0.761429	-0.395208	0.0273333
Jasmonate-induced protein	defense	-0.477604	0.41	-1.09323	0.0341667	-0.562083	0.640625	-1.44938	0	-0.393125	0.82	-0.737083	0.0878571	-0.198333	0.886129	0.151146	0.95	-0.0096875	0.98	-0.521667	0.41	0.294167	0.82	-0.343542	0.956667	0.125	0.82	0.008125	0.99	0.324167	0.556429	0.686302	1	-1.19229	0.41	-0.50599	1
Lipoxygenase	defense	0.0861458	0.93275	0.103021	0.740645	0.341667	0.640625	0.01375	0.99425	-0.169375	0.926296	0.192292	0.687742	-0.230833	0.886129	0.341146	0.774444	0.282187	0.364444	-0.537917	0.458235	0.489167	0.738	0.278333	0.956667	0.07625	0.87	0.193125	0.99	0.286042	0.504615	0.491615	0	-0.316667	0	0.174948	0.581935
NPR1	defense	0.0498958	0.93275	0.713646	0	0.249792	0.640625	0.773125	0	-0.15	0.914615	0.654167	0.0372727	-0.123333	0.886129	-0.408854	0.082	0.0978125	0.938684	0.0383333	0.96	-0.242708	0.82	-0.258542	0.956667	-0.285	0.644286	-0.575	0	0.454167	0.230625	0.576615	1	0.0720833	0	0.648698	0.0723529
Pathogenesis-related protein 10	defense	0.510208	0.93275	0.0730208	0.89359	0.794792	0.798421	-0.08375	0.956667	0.225625	0.964054	0.229792	0.798421	-1.33708	0.886129	-0.0366667	0.95	-0.954063	0.205	-2.37042	0.273333	-0.192708	0.946154	0.0183333	0.98	-0.30375	0.82	0.119375	0.99	-1.92646	0	0.359896	0.728889	0.309427	0.396774	0.669323	0
Pathogenesis-related protein3	defense	0.0492708	0.93275	0.296458	0.600357	0.514792	0.902	0.46375	0.273333	-0.41625	0.82	0.129167	0.809487	-0.268333	0.886129	0.378021	0.902	0.54625	0.447273	-1.18167	0.273333	0.889792	0.82	0.527083	0.956667	0.645	0.35875	-0.13375	0.99	0.565417	0.351429	-0.00369792	0.615	0.577552	0.0482353	0.573854	0.213913
Protease inhibitor; Proteinase inhibitor	defense	0.150208	0.93275	0.426771	0.520385	0.319167	0.943	0.2725	0.781563	-0.01875	0.98	0.581042	0.495417	-0.164583	0.888333	0.729583	0.902	0.561562	0.599231	-1.28417	0.273333	0.290417	0.946154	0.885833	0.956667	0.955	0.369	1.16875	0.656	0.237292	0.796571	0.494583	0	0.520365	0.220769	1.01495	0
Al-activated malate transporter 10	exudation	0.0780208	0.93275	-1.84542	0	-0.0202083	0.97	-1.82	0.0455556	0.17625	0.914615	-1.87083	0.0878571	0.451042	0.886129	-0.245104	0.95	1.03375	0.447273	1.86958	0.346923	-0.0752083	0.946154	-0.205417	0.956667	-0.9675	0.369	-0.415	0.670909	2.27292	0.0585714	0.215365	0	-1.10807	0.851538	-0.892708	0.0863158
Al-activated malate transporter 8	exudation	-0.416042	0.273333	0.0794097	0.89359	-0.348958	0.640625	-0.00946429	0.99425	-0.483125	0.82	0.0822917	0.8405	-0.240833	0.886129	-0.0260417	0.95	0.316861	0.690526	-1.13792	0.273333	-0.0414583	0.946154	0.350357	0.956667	0.65625	0.577727	-0.010625	0.99	0.206042	0.753871	-0.0741667	1	-0.771862	0	-0.846028	0
benzoxazinless1	exudation	-1.1101	0.473077	-0.297917	0.740645	-0.537083	0.943	0.02625	0.99425	-1.68312	0.82	-0.622083	0.577037	-0.103333	0.895526	-1.94448	0.082	-0.958125	0.3075	0.563333	0.669667	-2.23708	0.683333	-0.359167	0.956667	-0.77	0.322143	-1.65187	0.615	-1.55708	0.0585714	-1.67182	0	-0.260573	0	-1.9324	0
MATE1	exudation	-0.380104	0.273333	-0.0469792	0.880294	-0.444583	0.527143	-0.000625	1	-0.315625	0.82	-0.0933333	0.738	0.00166667	1	-0.177604	0.949474	-0.0903125	0.791724	-0.295417	0.727419	-0.217083	0.82	-0.0635417	0.956667	0.29875	0.6068	-0.138125	0.99	-0.117083	0.751667	-0.950573	1	0.558333	0.0292857	-0.39224	0
sucrose transporter1	exudation	-0.0235417	0.93275	0.248333	0.740645	0.0804167	0.943	0.56875	0.283846	-0.1275	0.914615	-0.0720833	0.85	-0.322708	0.886129	-0.0260417	0.95	0.10875	0.938684	-0.952917	0.273333	-0.0395833	0.946154	0.233333	0.956667	0.3075	0.664483	-0.0125	0.99	-0.0158333	0.97	-1.53573	0.521818	0.731771	0.107895	-0.803958	0.868235
SWEET13c	exudation	0.237708	0.93275	0.0983333	0.89359	0.336667	0.913182	0.900625	0.0273333	0.13875	0.964054	-0.703958	0.356522	0.171667	0.888333	0.510833	0.5125	0.27125	0.791724	-0.276667	0.892353	0.577917	0.82	-0.191042	0.956667	0.62	0.66625	0.44375	0.99	0.733542	0.351429	-0.454167	0.109333	0.626771	1	0.172604	0.0273333
SWEET4a	exudation	-0.0857292	0.93275	0.261771	0.520385	-0.0752083	0.943	0.135625	0.621613	-0.09625	0.964054	0.387917	0.273333	-0.0714583	0.888333	-0.241979	0.902	-0.302812	0.627059	-0.410417	0.41	-0.236458	0.82	-0.0410417	0.956667	0.2675	0.644286	-0.2475	0.99	-0.564583	0.1025	-0.217448	0	0.463333	0	0.245885	0
transporter of mugineic acid1	exudation	0.418958	0.93275	-4.60323	0	1.24292	0.640625	-3.95125	0.0455556	-0.405	0.914615	-5.25521	0	2.13604	0.886129	-0.449167	0.95	1.56469	0.627059	1.96333	0.669667	-1.13958	0.82	-0.850417	0.956667	2.30875	0.246	0.24125	0.99	3.97979	0.170833	0.658646	1	-0.393698	0	0.264948	0
Auxin response factor 16	growth	0.0427083	0.93275	0.684896	0	0.0316667	0.943	0.65625	0.0273333	0.05375	0.964054	0.713542	0.0372727	-0.130833	0.886129	-0.406667	0.082	0.146563	0.791724	-0.0279167	0.96	-0.410833	0.761429	-0.132917	0.956667	-0.23375	0.6068	-0.4025	0.5125	0.426042	0.296111	0.115521	0.791724	0.19474	0.675294	0.31026	0.902
Auxin response factor 8	growth	-0.311979	0.41	0.464896	0.194211	-0.446458	0.640625	0.35875	0.0931818	-0.1775	0.896875	0.571042	0.0372727	-0.312708	0.886129	-0.456979	0.082	0.0653125	0.938684	-0.800417	0.273333	-0.651458	0.683333	0.0533333	0.956667	0.175	0.797222	-0.2625	0.656	0.0772917	0.831081	-0.496198	0.725385	-0.000729167	0.187917	-0.496927	0
Expansin-A11	growth	0.0658333	0.93275	-0.827292	0.082	0.0522917	0.943	-0.43375	0.2788	0.079375	0.964054	-1.22083	0.179375	-0.00208333	1	-0.392292	0.902	0.88875	0.273333	-0.644167	0.646538	-0.130208	0.946154	0.202083	0.956667	0.64	0.361765	-0.654375	0.615	1.57542	0.0585714	-0.153229	1	0.163646	0.851538	0.0104167	1
Kinesin KP1	growth	-0.0772917	0.93275	-1.09292	0	-0.180208	0.943	-0.98875	0.0273333	0.025625	0.98	-1.19708	0.0372727	0.211042	0.886129	-0.104792	0.95	0.60875	0.3075	0.643333	0.646538	0.0247917	0.97375	0.273333	0.956667	-0.22125	0.773143	-0.234375	0.99	0.944167	0.175714	-0.495729	0.970333	-0.621354	0.774444	-1.11708	0.1025
HAK20	K_transport	-0.310417	0.93275	-0.898542	0.205	-0.580208	0.640625	-1.45	0.0647368	-0.040625	0.98	-0.347083	0.695758	0.956042	0.886129	-0.198542	0.95	0.141875	0.938684	-0.189167	0.899722	-0.177708	0.946154	-0.404167	0.956667	2.10125	0.322143	-0.219375	0.99	0.687917	0.41	2.07083	0.0585714	0.735833	0.175714	2.80667	1
KCH2	K_transport	-0.766667	0.273333	0.554583	0.179375	-0.538333	0.640625	0.383125	0.267391	-0.995	0.82	0.726042	0.164	-0.172708	0.888333	-0.297292	0.949474	0.05375	0.938684	-1.21417	0.273333	0.249167	0.82	0.250208	0.956667	0.86875	0.322143	-0.84375	0.656	-0.142708	0.831081	-1.02917	0	0.475833	0	-0.553333	0.236538
ZORK	K_transport	0.293646	0.497857	0.741146	0	0.117917	0.943	0.46625	0.0273333	0.469375	0.82	1.01604	0	-0.267708	0.886129	-0.573229	0	-0.0378125	0.938684	-0.455417	0.646538	-0.563333	0.683333	0.0145833	0.98	-0.08	0.87	-0.583125	0.5125	-0.0902083	0.841579	0.0969271	0	0.314896	0	0.411823	0
AMT2	N_transport	0.119271	0.93275	-0.951667	0.082	0.607917	0.651176	-1.115	0	-0.369375	0.82	-0.788333	0.0878571	0.212917	0.886129	-0.208854	0.95	0.380625	0.791724	-0.764167	0.273333	-0.138333	0.946154	0.343333	0.956667	1.19	0.246	-0.279375	0.99	0.417917	0.4428	-0.454635	0	0.73599	0.186364	0.281354	0.0723529
AMT7	N_transport	-0.831667	0.273333	-0.386042	0.5125	-1.21271	0.205	-1.14187	0.0455556	-0.450625	0.914615	0.369792	0.577037	0.0904167	0.935641	-0.170417	0.95	0.25625	0.791724	-0.744167	0.669667	-0.347708	0.82	0.113958	0.956667	0.925	0.322143	0.006875	0.99	0.398542	0.531481	1.19646	1	-0.500729	0.187917	0.695729	0.581935
NRT2	N_transport	0.956854	0.273333	-1.13354	0.194211	1.09595	0.527143	-2.03187	0.0273333	0.79625	0.82	-0.235208	0.711471	1.17792	0.886129	-0.803042	0.5125	-0.13875	0.938684	-0.691667	0.646538	-0.547351	0.82	-0.342292	0.956667	3.0475	0.205	-1.07625	0.656	0.0647917	0.902	-0.948931	0.615	1.15466	0.123	0.205729	0.0863158
NRT3	N_transport	-0.0701042	0.93275	-0.790417	0.273333	-0.362708	0.943	-0.5525	0.437333	0.2225	0.964054	-1.02833	0.316818	0.582917	0.886129	-0.145104	0.95	1.0625	0.3075	1.39458	0.592222	-0.177708	0.946154	0.179583	0.956667	-0.22875	0.87	-0.1125	0.99	1.94542	0	-0.00713542	0	-0.34526	0.608788	-0.352396	0
NRT5	N_transport	-0.761042	0.273333	0.118021	0.89359	-1.07521	0.5125	-0.51625	0.437333	-0.446875	0.914615	0.752292	0.237368	0.184167	0.888333	-0.169792	0.95	-0.154688	0.938684	-0.795417	0.669667	-0.403958	0.82	-0.0166667	0.98	1.16375	0.322143	0.064375	0.99	-0.292708	0.751667	0.770521	1	0.578802	0.369	1.34932	0.205
PHT12	P_transport	-1.06885	0.273333	-0.406042	0.531481	-1.67708	0.205	-1.16375	0	-0.460625	0.82	0.351667	0.585714	-0.803958	0.886129	-0.209479	0.95	-0.079375	0.938684	-0.602917	0.646538	-0.559583	0.82	0.359583	0.956667	-1.005	0.488095	0.140625	0.99	-0.518333	0.356522	-0.650885	0.15375	-0.99276	0	-1.64365	0.236538
PHT2	P_transport	0.025997	0.93275	-0.374792	0.279545	0.112917	0.943	-0.845625	0	0.0302083	0.964054	0.0960417	0.751667	-0.305833	0.886129	0.0267778	0.95	0.155625	0.791724	-0.159167	0.857273	0.125417	0.82	-0.0172917	0.98	-0.4525	0.369	-0.0859524	0.99	0.328542	0.265294	-0.222139	0	-0.310257	0.851538	-0.532396	0.0273333
PHT7	P_transport	-0.0244792	0.95	-0.150104	0.87125	-0.123958	0.943	-0.806875	0.0780952	0.075	0.964054	0.506667	0.0372727	-0.567083	0.886129	-0.238854	0.95	-0.272188	0.791724	-0.0216667	0.96	-0.338958	0.82	-0.128542	0.956667	-1.1125	0.355333	-0.13875	0.99	-0.415833	0.164	-0.327448	0.6232	0.268021	0.0911111	-0.0594271	1
PIP1;5	water	0.132708	0.93275	-1.06385	0	0.104792	0.943	-1.14062	0	0.160625	0.914615	-0.987083	0.0372727	0.312292	0.886129	0.173333	0.949474	0.174687	0.791724	0.859583	0.273333	0.517292	0.761429	-0.229792	0.956667	-0.235	0.615	-0.170625	0.99	0.579167	0.302105	0.617396	1	-0.0552604	0	0.562135	1
PIP2;3	water	0.0927083	0.93275	-1.95229	0	-0.0402083	0.943	-2.15313	0.0273333	0.225625	0.82	-1.75146	0	0.306667	0.886129	-0.0322917	0.95	0.41625	0.791724	0.799583	0.646538	0.147292	0.946154	0.0452083	0.98	-0.18625	0.66625	-0.211875	0.99	0.787292	0.354091	0.494896	0.341667	-0.0226042	0.0482353	0.472292	0.979444
PIP2;6	water	-0.0707292	0.93275	-1.22354	0	-0.336458	0.913182	-1.36437	0.0273333	0.195	0.914615	-1.08271	0	0.350417	0.886129	0.327396	0.902	-0.03	0.95325	1.67333	0.273333	0.806042	0.738	-0.254792	0.956667	-0.9725	0.322143	-0.15125	0.99	0.194792	0.755938	1.1138	0.0585714	0.148802	0.97375	1.2626	0.0273333
	Sum P<0.05		0		12		0		18		0		11		0		1		1		0		0		0		0		1		3		12		17		15

## Sheet: Sheet1
Plant age and soil texture rather than the presence of root hairs cause differences in maize resource allocation and root gene expression in the field
Plant and Soil
Minh Ganther, Eva Lippold, Manuela Désirée Bienert, Marie-Lara Bouffaud, Mario Bauer, Louis Baumann, Gerd Patrick Bienert, Doris Vetterlein, Anna Heintz-Buschart, Mika Tapio Tarkka*
*Corresponding Author: mika.tarkka@ufz.de (Helmholtz-Institute for Environmental Research - UFZ, Halle, Germany)
Supplementary File 6 (ESM6)
Supplementary Table 12: qPCR gene expression in relation to stage, substrate and depth
Differential expression was determined by Anova and Tukey HSD test. Genes with corrected p-value (BH correction) padj<0.05 were considered as differentially expressed.
Log fold changes (LFC) were calculated with the delta delta CT method, using three reference genes for normalization.
Genes were selected according to differential gene expression in a prior lab scale experiment (Ganther et al. 2021).
L: Loam, S: Sand
depth_19		refers to depth effect (D2 vs D1-baseline) in BBCH19
depth_19_L		refers to depth effect (D2 vs D1-baseline) in BBCH19 in Loam

## Sheet: qPCR_results
FDR corrected		depth_19	depth_19	depth_59	depth_59	depth_19_L	depth_19_L	depth_59_L	depth_59_L	depth_19_S	depth_19_S	depth_59_S	depth_59_S	BBCH19vBBCH14	BBCH19vBBCH14	BBCH59vBBCH19	BBCH59vBBCH19	BBCH59vBBCH14	BBCH59vBBCH14
name	category	LFC	P	LFC	P	LFC	P	LFC	P	LFC	P	LFC	P	LFC	P	LFC	P	LFC	P
ABA stress ripening3	defense	-0.290417	0.93275	0.116146	0.880294	-0.0502083	0.943	-0.1	0.948857	-0.530625	0.82	0.332292	0.691875	-2.10979	0.366842	-0.442448	0.0482353	-2.55224	0.453929
ACC synthase6	defense	0.0686458	0.93275	0.0808333	0.89359	-0.0720833	0.943	-0.411875	0.394815	0.209375	0.914615	0.573542	0.192941	1.29286	0.313529	-1.00182	0.240345	0.291042	0.494828
Acidic endochitinase	defense	-0.530104	0.93275	0.0475833	0.95	-0.762708	0.527143	-0.0745833	0.99425	-0.2975	0.964054	0.222292	0.798421	4.26036	0.488095	-2.49068	0.0292857	1.76968	0.334074
Chitinase chem5	defense	0.0711458	0.93275	0.348021	0.32087	0.0847917	0.943	0.4375	0.437333	0.0575	0.964054	0.258542	0.577037	0.66099	0.746786	0.542396	0.0292857	1.20339	0
Defensin-like protein 6	defense	0.227083	0.93275	-1.5576	0.0630769	-0.166458	0.943	-0.308125	0.807941	0.620625	0.914615	-2.80708	0	0.119583	0	-1.60026	0.1968	-1.48068	0.745455
Disease resistance RPP13-like 4	defense	0.269583	0.93275	-1.30385	0.0341667	0.558542	0.798421	-1.57187	0	-0.019375	0.98	-1.03583	0.246	-0.0516667	0	-0.49901	0.240345	-0.550677	0.15619
Ethylene receptor homolog2	defense	0.176146	0.273333	-0.00541667	0.95	0.215417	0.615	-0.056875	0.807941	0.136875	0.82	0.0460417	0.687742	-0.11526	0.488095	-0.144635	0.0292857	-0.259896	0.236538
Ethylene-responsive TF2	defense	0.274583	0.444167	0.528333	0.0341667	0.146042	0.943	0.563125	0.0273333	0.403125	0.82	0.493542	0.237368	-0.0819792	1	0.234896	0.240345	0.152917	0.745455
Gibberellin 20-oxidase3	defense	-0.961354	0.273333	-0.491042	0.192941	-1.45083	0.273333	-0.68875	0.0780952	-0.471875	0.82	-0.293333	0.687742	-0.0436979	1	-0.35151	0.761429	-0.395208	0.0273333
Jasmonate-induced protein	defense	-0.477604	0.41	-1.09323	0.0341667	-0.562083	0.640625	-1.44938	0	-0.393125	0.82	-0.737083	0.0878571	0.686302	1	-1.19229	0.41	-0.50599	1
Lipoxygenase	defense	0.0861458	0.93275	0.103021	0.740645	0.341667	0.640625	0.01375	0.99425	-0.169375	0.926296	0.192292	0.687742	0.491615	0	-0.316667	0	0.174948	0.581935
NPR1	defense	0.0498958	0.93275	0.713646	0	0.249792	0.640625	0.773125	0	-0.15	0.914615	0.654167	0.0372727	0.576615	1	0.0720833	0	0.648698	0.0723529
Pathogenesis-related protein 10	defense	0.510208	0.93275	0.0730208	0.89359	0.794792	0.798421	-0.08375	0.956667	0.225625	0.964054	0.229792	0.798421	0.359896	0.728889	0.309427	0.396774	0.669323	0
Pathogenesis-related protein3	defense	0.0492708	0.93275	0.296458	0.600357	0.514792	0.902	0.46375	0.273333	-0.41625	0.82	0.129167	0.809487	-0.00369792	0.615	0.577552	0.0482353	0.573854	0.213913
Protease inhibitor; Proteinase inhibitor	defense	0.150208	0.93275	0.426771	0.520385	0.319167	0.943	0.2725	0.781563	-0.01875	0.98	0.581042	0.495417	0.494583	0	0.520365	0.220769	1.01495	0
Al-activated malate transporter 10	exudation	0.0780208	0.93275	-1.84542	0	-0.0202083	0.97	-1.82	0.0455556	0.17625	0.914615	-1.87083	0.0878571	0.215365	0	-1.10807	0.851538	-0.892708	0.0863158
Al-activated malate transporter 8	exudation	-0.416042	0.273333	0.0794097	0.89359	-0.348958	0.640625	-0.00946429	0.99425	-0.483125	0.82	0.0822917	0.8405	-0.0741667	1	-0.771862	0	-0.846028	0
benzoxazinless1	exudation	-1.1101	0.473077	-0.297917	0.740645	-0.537083	0.943	0.02625	0.99425	-1.68312	0.82	-0.622083	0.577037	-1.67182	0	-0.260573	0	-1.9324	0
MATE1	exudation	-0.380104	0.273333	-0.0469792	0.880294	-0.444583	0.527143	-0.000625	1	-0.315625	0.82	-0.0933333	0.738	-0.950573	1	0.558333	0.0292857	-0.39224	0
sucrose transporter1	exudation	-0.0235417	0.93275	0.248333	0.740645	0.0804167	0.943	0.56875	0.283846	-0.1275	0.914615	-0.0720833	0.85	-1.53573	0.521818	0.731771	0.107895	-0.803958	0.868235
SWEET13c	exudation	0.237708	0.93275	0.0983333	0.89359	0.336667	0.913182	0.900625	0.0273333	0.13875	0.964054	-0.703958	0.356522	-0.454167	0.109333	0.626771	1	0.172604	0.0273333
SWEET4a	exudation	-0.0857292	0.93275	0.261771	0.520385	-0.0752083	0.943	0.135625	0.621613	-0.09625	0.964054	0.387917	0.273333	-0.217448	0	0.463333	0	0.245885	0
transporter of mugineic acid1	exudation	0.418958	0.93275	-4.60323	0	1.24292	0.640625	-3.95125	0.0455556	-0.405	0.914615	-5.25521	0	0.658646	1	-0.393698	0	0.264948	0
Auxin response factor 16	growth	0.0427083	0.93275	0.684896	0	0.0316667	0.943	0.65625	0.0273333	0.05375	0.964054	0.713542	0.0372727	0.115521	0.791724	0.19474	0.675294	0.31026	0.902
Auxin response factor 8	growth	-0.311979	0.41	0.464896	0.194211	-0.446458	0.640625	0.35875	0.0931818	-0.1775	0.896875	0.571042	0.0372727	-0.496198	0.725385	-0.000729167	0.187917	-0.496927	0
Expansin-A11	growth	0.0658333	0.93275	-0.827292	0.082	0.0522917	0.943	-0.43375	0.2788	0.079375	0.964054	-1.22083	0.179375	-0.153229	1	0.163646	0.851538	0.0104167	1
Kinesin KP1	growth	-0.0772917	0.93275	-1.09292	0	-0.180208	0.943	-0.98875	0.0273333	0.025625	0.98	-1.19708	0.0372727	-0.495729	0.970333	-0.621354	0.774444	-1.11708	0.1025
HAK20	K_transport	-0.310417	0.93275	-0.898542	0.205	-0.580208	0.640625	-1.45	0.0647368	-0.040625	0.98	-0.347083	0.695758	2.07083	0.0585714	0.735833	0.175714	2.80667	1
KCH2	K_transport	-0.766667	0.273333	0.554583	0.179375	-0.538333	0.640625	0.383125	0.267391	-0.995	0.82	0.726042	0.164	-1.02917	0	0.475833	0	-0.553333	0.236538
ZORK	K_transport	0.293646	0.497857	0.741146	0	0.117917	0.943	0.46625	0.0273333	0.469375	0.82	1.01604	0	0.0969271	0	0.314896	0	0.411823	0
AMT2	N_transport	0.119271	0.93275	-0.951667	0.082	0.607917	0.651176	-1.115	0	-0.369375	0.82	-0.788333	0.0878571	-0.454635	0	0.73599	0.186364	0.281354	0.0723529
AMT7	N_transport	-0.831667	0.273333	-0.386042	0.5125	-1.21271	0.205	-1.14187	0.0455556	-0.450625	0.914615	0.369792	0.577037	1.19646	1	-0.500729	0.187917	0.695729	0.581935
NRT2	N_transport	0.956854	0.273333	-1.13354	0.194211	1.09595	0.527143	-2.03187	0.0273333	0.79625	0.82	-0.235208	0.711471	-0.948931	0.615	1.15466	0.123	0.205729	0.0863158
NRT3	N_transport	-0.0701042	0.93275	-0.790417	0.273333	-0.362708	0.943	-0.5525	0.437333	0.2225	0.964054	-1.02833	0.316818	-0.00713542	0	-0.34526	0.608788	-0.352396	0
NRT5	N_transport	-0.761042	0.273333	0.118021	0.89359	-1.07521	0.5125	-0.51625	0.437333	-0.446875	0.914615	0.752292	0.237368	0.770521	1	0.578802	0.369	1.34932	0.205
PHT12	P_transport	-1.06885	0.273333	-0.406042	0.531481	-1.67708	0.205	-1.16375	0	-0.460625	0.82	0.351667	0.585714	-0.650885	0.15375	-0.99276	0	-1.64365	0.236538
PHT2	P_transport	0.025997	0.93275	-0.374792	0.279545	0.112917	0.943	-0.845625	0	0.0302083	0.964054	0.0960417	0.751667	-0.222139	0	-0.310257	0.851538	-0.532396	0.0273333
PHT7	P_transport	-0.0244792	0.95	-0.150104	0.87125	-0.123958	0.943	-0.806875	0.0780952	0.075	0.964054	0.506667	0.0372727	-0.327448	0.6232	0.268021	0.0911111	-0.0594271	1
PIP1;5	water	0.132708	0.93275	-1.06385	0	0.104792	0.943	-1.14062	0	0.160625	0.914615	-0.987083	0.0372727	0.617396	1	-0.0552604	0	0.562135	1
PIP2;3	water	0.0927083	0.93275	-1.95229	0	-0.0402083	0.943	-2.15313	0.0273333	0.225625	0.82	-1.75146	0	0.494896	0.341667	-0.0226042	0.0482353	0.472292	0.979444
PIP2;6	water	-0.0707292	0.93275	-1.22354	0	-0.336458	0.913182	-1.36437	0.0273333	0.195	0.914615	-1.08271	0	1.1138	0.0585714	0.148802	0.97375	1.2626	0.0273333
	Sum P<0.05		0		9		0		15		0		8		12		15		14
